# Supplementary material for: Investigating the effect of silicate- and calcium-based ocean alkalinity enhancement on diatom silicification
Source: Copernicus journal article supplement (doi:10.5194/bg-21-2777-2024), 2024-06-12
Supplement: Supplementary file 1 [file bg-21-2777-2024-supplement.pdf]

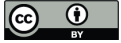

*Supplement of*

## **Investigating the effect of silicate- and calcium-based ocean alkalinity enhancement on diatom silicification**

**Aaron Ferderer et al.**

*Correspondence to:* Aaron Ferderer (aaron.ferderer@utas.edu.au)

The copyright of individual parts of the supplement might differ from the article licence.

**Table S1.** Representative images of each genus used for statistical analysis.

| Genus/group             | Image                                                                               |
|-------------------------|-------------------------------------------------------------------------------------|
| <i>Arcocellulus</i>     | 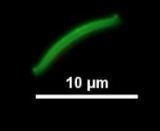   |
| <i>Cylindrotheca</i>    |   |
| <i>Nitzschia</i>        |   |
| <i>Pseudo-nitzschia</i> |  |
| <i>Skeletonema</i>      |  |
| <i>Thalassiosira</i>    |  |

**Table S2.** Results of post-hoc test (*emtrands*) assessing the variation in silicification between genera as a function of total alkalinity and alkalinity source mineral treatment.

| <b>Mineral treatment</b> | <b>Contrast</b>                         | <b>Total alkalinity mean trend</b> | <b>Standard error</b> | <b>t-ratio</b> | <b>p-value</b> |
|--------------------------|-----------------------------------------|------------------------------------|-----------------------|----------------|----------------|
| <i>Ca</i>                | <i>Arcocellulus - Cylindrotheca</i>     | -0.09                              | 0.06                  | -1.53          | 0.65           |
| <i>Ca</i>                | <i>Arcocellulus - Nitzschia</i>         | -0.08                              | 0.05                  | -1.53          | 0.64           |
| <i>Ca</i>                | <i>Arcocellulus - Pseudo-nitzschia</i>  | -0.33                              | 0.05                  | -7.22          | <0.001*        |
| <i>Ca</i>                | <i>Arcocellulus - Skeletonema</i>       | -0.06                              | 0.05                  | -1.12          | 0.87           |
| <i>Ca</i>                | <i>Arcocellulus - Thalassiosira</i>     | 0.06                               | 0.04                  | 1.55           | 0.63           |
| <i>Ca</i>                | <i>Cylindrotheca - Nitzschia</i>        | 0.01                               | 0.06                  | 0.21           | 1.00           |
| <i>Ca</i>                | <i>Cylindrotheca- Pseudo-nitzschia</i>  | -0.24                              | 0.05                  | -4.32          | <0.001*        |
| <i>Ca</i>                | <i>Cylindrotheca - Skeletonema</i>      | 0.03                               | 0.06                  | 0.55           | 0.99           |
| <i>Ca</i>                | <i>Cylindrotheca - Thalassiosira</i>    | 0.15                               | 0.07                  | 2.36           | 0.17           |
| <i>Ca</i>                | <i>Nitzschia - Pseudo-nitzschia</i>     | -0.25                              | 0.04                  | -6.79          | <0.001*        |
| <i>Ca</i>                | <i>Nitzschia - Skeletonema</i>          | 0.02                               | 0.05                  | 0.42           | 1.00           |
| <i>Ca</i>                | <i>Nitzschia - Thalassiosira</i>        | 0.14                               | 0.06                  | 2.42           | 0.15           |
| <i>Ca</i>                | <i>Pseudo-nitzschia - Skeletonema</i>   | 0.27                               | 0.04                  | 6.10           | <0.001*        |
| <i>Ca</i>                | <i>Pseudo-nitzschia - Thalassiosira</i> | 0.39                               | 0.05                  | 7.32           | <0.001*        |
| <i>Ca</i>                | <i>Skeletonema - Thalassiosira</i>      | 0.12                               | 0.06                  | 2.06           | 0.31           |
| <i>Si</i>                | <i>Arcocellulus – Cylindrotheca</i>     | -0.06                              | 0.06                  | -0.92          | 0.94           |
| <i>Si</i>                | <i>Arcocellulus - Nitzschia</i>         | -0.40                              | 0.05                  | -7.64          | <0.001*        |
| <i>Si</i>                | <i>Arcocellulus - Pseudo-nitzschia</i>  | -0.37                              | 0.03                  | -11.20         | <0.001*        |
| <i>Si</i>                | <i>Arcocellulus - Skeletonema</i>       | -0.03                              | 0.03                  | -1.06          | 0.90           |
| <i>Si</i>                | <i>Arcocellulus - Thalassiosira</i>     | 0.04                               | 0.03                  | 1.67           | 0.56           |
| <i>Si</i>                | <i>Cylindrotheca- Nitzschia</i>         | -0.35                              | 0.07                  | -4.68          | <0.001*        |
| <i>Si</i>                | <i>Cylindrotheca- Pseudo-nitzschia</i>  | -0.31                              | 0.06                  | -5.02          | <0.001*        |
| <i>Si</i>                | <i>Cylindrotheca- Skeletonema</i>       | 0.02                               | 0.06                  | 0.34           | 1.000          |
| <i>Si</i>                | <i>Cylindrotheca- Thalassiosira</i>     | 0.10                               | 0.06                  | 1.60           | 0.60           |
| <i>Si</i>                | <i>nitzschia – Pseudo-nitzschia</i>     | 0.04                               | 0.05                  | 0.72           | 0.98           |
| <i>Si</i>                | <i>nitzschia - Skeletonema</i>          | 0.37                               | 0.05                  | 7.59           | <0.001*        |
| <i>Si</i>                | <i>nitzschia - Thalassiosira</i>        | 0.45                               | 0.05                  | 8.25           | <0.001*        |
| <i>Si</i>                | <i>Pseudo-nitzschia - Skeletonema</i>   | 0.33                               | 0.03                  | 12.02          | <0.001*        |
| <i>Si</i>                | <i>Pseudo-nitzschia - Thalassiosira</i> | 0.41                               | 0.04                  | 11.54          | <0.001*        |
| <i>Si</i>                | <i>Skeletonema - Thalassiosira</i>      | 0.08                               | 0.03                  | 2.22           | 0.23           |
